# Supplementary material for: The Effect of High Voltage Electrical Discharge on the Physicochemical Properties and the Microbiological Safety of Rose Hip Nectars
Source: MDPI journal article supplement (doi:10.3390/foods11050651), 2022-02-23
Supplement: s1 [file s1]

**Table S1.** Pearson correlation coefficients between physicochemical parameters, antioxidant activity (ABTS and DPPH), and colour parameters (L\* and a\*) of rose hip nectar treated with different HVED frequencies and time ( $p < 0.05$ ).

|                        | pH            | Electrical<br>conduct. | Ascorbic<br>acid | TPC    | Flavan-<br>3-ols | Flavonols | ABTS  | DPPH  | L*           | a* |
|------------------------|---------------|------------------------|------------------|--------|------------------|-----------|-------|-------|--------------|----|
| pH                     | 1             |                        |                  |        |                  |           |       |       |              |    |
| Electrical<br>conduct. | <b>-0.842</b> | 1                      |                  |        |                  |           |       |       |              |    |
| Ascorbic acid          | -0.512        | 0.537                  | 1                |        |                  |           |       |       |              |    |
| TPC                    | -0.165        | 0.275                  | 0.511            | 1      |                  |           |       |       |              |    |
| Flavan-3-ols           | -0.468        | 0.514                  | 0.539            | 0.258  | 1                |           |       |       |              |    |
| Flavonols              | -0.560        | 0.488                  | 0.494            | -0.007 | 0.179            | 1         |       |       |              |    |
| ABTS                   | 0.236         | 0.032                  | -0.423           | -0.248 | -0.106           | -0.581    | 1     |       |              |    |
| DPPH                   | 0.194         | -0.196                 | -0.197           | -0.138 | -0.478           | -0.571    | 0.634 | 1     |              |    |
| L*                     | 0.679         | -0.600                 | -0.455           | -0.186 | -0.322           | -0.804    | 0.696 | 0.686 | 1            |    |
| a*                     | 0.678         | -0.600                 | -0.456           | -0.220 | -0.364           | -0.752    | 0.679 | 0.691 | <b>0.955</b> | 1  |

**Table S2.** The results of the post-hoc Tukey test applied on physicochemical parameters, antioxidant activity (ABTS and DPPH), and colour parameters (L\* and a\*) of rose hip nectar treated with different HVED frequencies (50 and 100 Hz). The time of treatment was 10, 15, and 20 minutes.

| F (Hz) | Time (min) | Electrical conduct. | Ascorbic acid | TPC | Flavan-3-ols | Flavonols | AA   |      | Colour parameter |    |
|--------|------------|---------------------|---------------|-----|--------------|-----------|------|------|------------------|----|
|        |            |                     |               |     |              |           | ABTS | DPPH | L*               | a* |
|        | 10         |                     |               |     |              |           |      |      |                  |    |
| 0      |            | b                   | b             | b   | a            | b         | a    | a    | a                | a  |
| 50     |            | b                   | a             | a   | a            | a         | c    | b    | b                | b  |
| 100    |            | a                   | a             | a   | a            | a         | b    | a    | b                | b  |
|        | 15         |                     |               |     |              |           |      |      |                  |    |
| 0      |            | c                   | a             | a   | b            | a         | a    | a    | a                | a  |
| 50     |            | b                   | a             | b   | a,b          | a         | c    | b    | b                | b  |
| 100    |            | a                   | a             | a   | a            | a         | b    | b    | b                | b  |
|        | 20         |                     |               |     |              |           |      |      |                  |    |
| 0      |            | c                   | c             | c   | a            | b         | a    | a    | a                | a  |
| 50     |            | b                   | b             | a   | a            | a         | b    | b    | b                | b  |
| 100    |            | a                   | a             | b   | a            | a         | b    | b    | b                | b  |

Differences in the same column are marked with different letters (post-hoc Tukey test  $p \leq 0.05$ ).

Flavan-3-ols - as a (+)-catechin.

Flavonols - as a quercetin-3-galactoside.

GAE - gallic acid equivalent.

TE - Trolox equivalent.

**Table S3.** The results of two-factor ANOVA analysis of physicochemical parameters, antioxidant activity (ABTS and DPPH), and colour parameters (L\* and a\*) of HVED treated rose hip nectar.

|        | Electrical conduct. |       | Ascorbic acid |       | TPC    |       | Flavan-3-ols |       | Flavonols |       | ABTS   |       | DPPH  |       | L*    |       | a*    |       |
|--------|---------------------|-------|---------------|-------|--------|-------|--------------|-------|-----------|-------|--------|-------|-------|-------|-------|-------|-------|-------|
|        | F                   | P     | F             | P     | F      | P     | F            | P     | F         | P     | F      | P     | F     | P     | F     | P     | F     | P     |
| Freq.  | 316.292             | 0.000 | 4.539         | 0.077 | 0.157  | 0.857 | 7.948        | 0.030 | 0.033     | 0.862 | 10.105 | 0.005 | 2.632 | 0.126 | 2.306 | 0.155 | 1.071 | 0.383 |
| Time   | 121.179             | 0.000 | 27.181        | 0.001 | 28.317 | 0.000 | 19.700       | 0.002 | 0.018     | 0.982 | 8.427  | 0.009 | 0.523 | 0.610 | 2.184 | 0.169 | 0.154 | 0.859 |
| Inter. | 39.274              | 0.000 | 4.763         | 0.058 | 4.197  | 0.034 | 21.242       | 0.002 | 1.122     | 0.386 | 6.301  | 0.011 | 0.923 | 0.492 | 0.773 | 0.569 | 0.916 | 0.495 |

ANOVA analysis with P-value  $\leq 0.05$  or F value  $\geq F_{\text{critical}}$  are statistically significant

F - F value

P - P value.

**Table S4.** Pearson correlation coefficients between physicochemical parameters and antioxidant activity (ABTS and DPPH) of different formulated rose hip nectars ( $p < 0.05$ ).

| Parameter              | Electrical<br>conduct. | Ascorbic<br>acid | TPC    | Flavan-3-<br>ols | Flavonols | ABTS         | DPPH |
|------------------------|------------------------|------------------|--------|------------------|-----------|--------------|------|
| Electrical<br>conduct. | 1                      |                  |        |                  |           |              |      |
| Ascorbic acid          | 0.268                  | 1                |        |                  |           |              |      |
| TPC                    | 0.326                  | 0.663            | 1      |                  |           |              |      |
| Flavan-3-ols           | -0.650                 | 0.316            | -0.052 | 1                |           |              |      |
| Flavonols              | -0.347                 | 0.584            | 0.547  | 0.276            | 1         |              |      |
| ABTS                   | -0.544                 | 0.584            | 0.513  | 0.691            | 0.835     | 1            |      |
| DPPH                   | -0.355                 | 0.688            | 0.616  | 0.633            | 0.779     | <b>0.937</b> | 1    |

**Table S5.** Pearson correlation coefficient between colour parameters (L\*, a\*, b\*, C\* and h°) of different formulated rose hip nectars (p < 0.05).

| Parameter | L*           | a*            | b*           | C*    | h° |
|-----------|--------------|---------------|--------------|-------|----|
| L*        | 1            |               |              |       |    |
| a*        | -0.700       | 1             |              |       |    |
| b*        | <b>0.987</b> | -0.697        | 1            |       |    |
| C*        | <b>0.938</b> | -0.533        | <b>0.925</b> | 1     |    |
| h°        | <b>0.906</b> | <b>-0.921</b> | <b>0.908</b> | 0.794 | 1  |

**Table S6.** The average counts of aerobic mesophilic bacteria (AMB) and *Enterobacteriaceae* (EB) in the nectars during 12 days of refrigerated storage.

| AMB            |                              |                     | EB         |                              |                     |
|----------------|------------------------------|---------------------|------------|------------------------------|---------------------|
| Sample/<br>Day | Microbiol.<br>limit (cfu/mL) | Results<br>(cfu/mL) | Sample/Day | Microbiol. limit<br>(cfu/mL) | Results<br>(cfu/mL) |
| Day "0"        |                              |                     | Day "0"    |                              |                     |
| N              | 10 <sup>3</sup>              | <10                 | N          | 10                           | <10                 |
| NP             | 10 <sup>3</sup>              | <10                 | NP         | 10                           | <10                 |
| NSP            | 10 <sup>3</sup>              | <10                 | NSP        | 10                           | <10                 |
| NBP 1          | 10 <sup>3</sup>              | <10                 | NBP 1      | 10                           | <10                 |
| NBP 2          | 10 <sup>3</sup>              | <10                 | NBP 2      | 10                           | <10                 |
| NPA            | 10 <sup>3</sup>              | <10                 | NPA        | 10                           | <10                 |
| Day 6          |                              |                     | Day 6      |                              |                     |
| N              | 10 <sup>3</sup>              | <10                 | N          | 10                           | <10                 |
| NP             | 10 <sup>3</sup>              | <10                 | NP         | 10                           | <10                 |
| NSP            | 10 <sup>3</sup>              | <10                 | NSP        | 10                           | <10                 |
| NBP 1          | 10 <sup>3</sup>              | <10                 | NBP 1      | 10                           | <10                 |
| NBP 2          | 10 <sup>3</sup>              | <10                 | NBP 2      | 10                           | <10                 |
| NPA            | 10 <sup>3</sup>              | <10                 | NPA        | 10                           | <10                 |
| Day 12         |                              |                     | Day 12     |                              |                     |
| N              | 10 <sup>3</sup>              | <10                 | N          | 10                           | <10                 |
| NP             | 10 <sup>3</sup>              | <10                 | NP         | 10                           | <10                 |
| NSP            | 10 <sup>3</sup>              | <10                 | NSP        | 10                           | <10                 |
| NBP 1          | 10 <sup>3</sup>              | <10                 | NBP 1      | 10                           | <10                 |
| NBP 2          | 10 <sup>3</sup>              | <10                 | NBP 2      | 10                           | <10                 |
| NPA            | 10 <sup>3</sup>              | <10                 | NPA        | 10                           | <10                 |

N - nectar without HVED treatment (control)

NP - HVED treated nectar

NSP - HVED treated low-calorie nectar

NBP 1 - nectar prepared from blanched pulp + HVED

NBP 2 - nectar prepared from blanched puree + HVED

NPA - pasteurised nectar.

**Table S7.** The results of the detection of *Salmonella* spp.(S), *Listeria monocytogenes* (LM), and average counts of *Escherichia coli* (EC) in the nectars during 12 days of refrigerated storage.

| Sample/<br>Day | S                               | Results<br>(cfu/mL) | LM                              | Results<br>(cfu/mL) | Sample/<br>Day | EC                              | Results<br>(cfu/mL) |
|----------------|---------------------------------|---------------------|---------------------------------|---------------------|----------------|---------------------------------|---------------------|
|                | Microbiol.<br>limit<br>(cfu/mL) |                     | Microbiol.<br>limit<br>(cfu/mL) |                     |                | Microbiol.<br>limit<br>(cfu/mL) |                     |
| Day "0"        | absence in 25 mL                |                     | absence in 25 mL                |                     | Day "0"        |                                 |                     |
| N              |                                 | nd                  |                                 | nd                  | N              | 10 <sup>2</sup>                 | <10                 |
| NP             |                                 | nd                  |                                 | nd                  | NP             | 10 <sup>2</sup>                 | <10                 |
| NSP            |                                 | nd                  |                                 | nd                  | NSP            | 10 <sup>2</sup>                 | <10                 |
| NBP 1          |                                 | nd                  |                                 | nd                  | NBP 1          | 10 <sup>2</sup>                 | <10                 |
| NBP 2          |                                 | nd                  |                                 | nd                  | NBP 2          | 10 <sup>2</sup>                 | <10                 |
| NPA            |                                 | nd                  |                                 | nd                  | NPA            | 10 <sup>2</sup>                 | <10                 |
| Day 6          | absence in 25 mL                |                     | absence in 25 mL                |                     | Day 6          |                                 |                     |
| N              |                                 | nd                  |                                 | nd                  | N              | 10 <sup>2</sup>                 | <10                 |
| NP             |                                 | nd                  |                                 | nd                  | NP             | 10 <sup>2</sup>                 | <10                 |
| NSP            |                                 | nd                  |                                 | nd                  | NSP            | 10 <sup>2</sup>                 | <10                 |
| NBP 1          |                                 | nd                  |                                 | nd                  | NBP 1          | 10 <sup>2</sup>                 | <10                 |
| NBP 2          |                                 | nd                  |                                 | nd                  | NBP 2          | 10 <sup>2</sup>                 | <10                 |
| NPA            |                                 | nd                  |                                 | nd                  | NPA            | 10 <sup>2</sup>                 | <10                 |
| Day 12         | absence in 25 mL                |                     | absence in 25 mL                |                     | Day 12         |                                 |                     |
| N              |                                 | nd                  |                                 | nd                  | N              | 10 <sup>2</sup>                 | <10                 |
| NP             |                                 | nd                  |                                 | nd                  | NP             | 10 <sup>2</sup>                 | <10                 |
| NSP            |                                 | nd                  |                                 | nd                  | NSP            | 10 <sup>2</sup>                 | <10                 |
| NBP 1          |                                 | nd                  |                                 | nd                  | NBP 1          | 10 <sup>2</sup>                 | <10                 |
| NBP 2          |                                 | nd                  |                                 | nd                  | NBP 2          | 10 <sup>2</sup>                 | <10                 |
| NPA            |                                 | nd                  |                                 | nd                  | NPA            | 10 <sup>2</sup>                 | <10                 |

N - nectar without HVED treatment (control)

NP - HVED treated nectar

NSP - HVED treated low-calorie nectar

NBP 1 - nectar prepared from blanched pulp + HVED

NBP 2 - nectar prepared from blanched puree + HVED

NPA - pasteurised nectar.
